# Supplementary material
Source: HighWire-hosted journal article supplement (https://ard.bmj.com/content/79/5/587)
Supplement: inline-supplementary-material-2 [file inline-supplementary-material-2.pdf]

## TABLES – SUPPLEMENTARY MATERIAL

TABLE S1. Demographic, clinical and serological features according to the presence of ILD in the replication sample

|                                     | Replication sample<br><i>n</i> :75 | RA-ILD<br><i>n</i> :25 | Non-ILD RA<br><i>n</i> :50 | <i>p</i> value |
|-------------------------------------|------------------------------------|------------------------|----------------------------|----------------|
| Female (%)                          | 40 (53)                            | 14 (56)                | 26 (52)                    | NS             |
| Mean age ( $\pm$ SD)                | 66.7 $\pm$ 8.8                     | 68.6 $\pm$ 10.5        | 65.7 $\pm$ 7.6             | NS             |
| Mean disease duration ( $\pm$ SD)   | 8.7 $\pm$ 11.1                     | 8.4 $\pm$ 9.5          | 8.9 $\pm$ 11.9             | NS             |
| Smoking cumulative dose ( $\pm$ SD) | 19.8 $\pm$ 20.1                    | 14.3 $\pm$ 20.0        | 22.6 $\pm$ 19.7            | NS             |
| Erosive disease (%)                 | 40 (53)                            | 15 (60)                | 25 (50)                    | NS             |
| ACPA (%)                            | 65 (87)                            | 24 (96)                | 41 (82)                    | NS             |
| Median titer ACPA (IQR) CU          | 250 (324)                          | 250 (308)              | 250 (367)                  | NS             |
| RF (%)                              | 52 (69)                            | 23 (92)                | 29 (58)                    | <0.005         |
| Median titer RF (IQR) IU            | 83 (284)                           | 165 (559)              | 38 (194)                   | <0.005         |
| Anti-FCS (%)                        | 47 (63)                            | 23 (92)                | 24 (48)                    | <0.005         |
| Median titer Anti-FCS (IQR) AU/mL   | 545 (1875)                         | 1571 (1316)            | 171 (977)                  | <0.005         |
| Anti-Fib (%)                        | 48 (64)                            | 19 (76)                | 29 (58)                    | NS             |
| Median titer Anti-Fib (IQR) AU/mL   | 282 (335)                          | 407 (418)              | 225 (277)                  | 0.028          |
| Anti-CFFHP (%)                      | 18 (24)                            | 9 (36)                 | 9 (18)                     | NS             |
| Median titer Anti-CFFHP (IQR) AU/mL | 0 (118)                            | 0 (598)                | 0 (54)                     | NS             |

ACPA: anti-citrullinated protein antibodies; RF: rheumatoid factor; Anti-FCS: IgG antibodies against carbamylated fetal calf serum; Anti-Fib: IgG antibodies against carbamylated fibrinogen; Anti-CFFHP: IgG antibodies against carbamylated fibrine/filagrine homocitrullinated peptide; IQR: interquartile range; CU: chemiluminescence units; IU: international units; AU: arbitrary unit;  $\pm$ SD: standard deviation; NS: Not significant.

TABLE S2. Anti-CarP positivity according to the smoking status in the main population

|                |                               | Anti-FCS                 |                | Anti-Fib                 |                | Anti-CFFHP               |                | Anti-FCS-IgA             |                |
|----------------|-------------------------------|--------------------------|----------------|--------------------------|----------------|--------------------------|----------------|--------------------------|----------------|
|                |                               | positive<br><i>n</i> (%) | <i>p</i> value |
| Smoking status | Ever<br><i>n</i> : 83         | 48 (58)                  | 0.022          | 54 (65)                  | 0.021          | 22 (27)                  | NS             | 31 (37)                  | 0.003          |
|                | Non-ever<br><i>n</i> : 96     | 39 (41)                  |                | 46 (48)                  |                | 19 (20)                  |                | 17 (18)                  |                |
|                | Current<br><i>n</i> : 30      | 20 (67)                  | 0.030          | 23 (77)                  | 0.012          | 5 (17)                   | NS             | 15 (50)                  | 0.002          |
|                | Non-current<br><i>n</i> : 149 | 67 (45)                  |                | 77 (52)                  |                | 36 (24)                  |                | 33 (22)                  |                |

Anti-FCS: IgG antibodies against carbamylated fetal calf serum; Anti-Fib: IgG antibodies against carbamylated fibrinogen; Anti-CFFHP: IgG antibodies against carbamylated fibrine/filagrine homocitrullinated peptide; Anti-FCS-IgA: IgA antibodies against carbamylated fetal calf serum; NS: not significant.

TABLE S3. Smoking cumulative dose according to Anti-CarP positivity in the main population

|                                             | Anti-FCS          |                   |            | Anti-Fib          |                   |            | Anti-CFFHP        |                   |            | Anti-FCS-IgA      |                   |            |
|---------------------------------------------|-------------------|-------------------|------------|-------------------|-------------------|------------|-------------------|-------------------|------------|-------------------|-------------------|------------|
|                                             | positive<br>n: 48 | negative<br>n: 35 | p<br>value | positive<br>n: 54 | negative<br>n: 29 | p<br>value | positive<br>n: 22 | negative<br>n: 61 | p<br>value | positive<br>n: 31 | negative<br>n: 52 | p<br>value |
| Mean smoking<br>cumulative dose ( $\pm$ SD) | 25.1 $\pm$ 12.9   | 22.6 $\pm$ 13.4   | NS         | 24.2 $\pm$ 12.9   | 23.8 $\pm$ 13.4   | NS         | 25.3 $\pm$ 10.8   | 23.6 $\pm$ 13.8   | NS         | 26.0 $\pm$ 12.7   | 22.9 $\pm$ 13.2   | NS         |

Anti-FCS: IgG antibodies against carbamylated fetal calf serum; Anti-Fib: IgG antibodies against carbamylated fibrinogen; Anti-CFFHP: IgG antibodies against carbamylated fibrine/filagrine homocitrullinated peptide; Anti-FCS-IgA: IgA antibodies against carbamylated fetal calf serum;  $\pm$ SD: standard deviation; NS: not significant
